# Supplementary material
Source: publisher figshare collection journal article supplement (https://acs.figshare.com/ndownloader/files/28258585)
Supplement: Supplementary file 1 [file 28258585]

## Supporting information

# Hyalase-mediated Cascade Degradation of Matrix Barrier and Immune Cell Penetration by Photothermal Microneedle for Efficient Anticancer Therapy

*Ting He<sup>a,†</sup>, Yu Luo<sup>b,c,\*</sup>, Qin Zhang<sup>d,†</sup>, Zening Men<sup>a</sup>, Tong Su<sup>a</sup>, Linpeng Fan<sup>e</sup>, Hangrong Chen<sup>\*b</sup>, Teng Shen<sup>\*a</sup>*

<sup>a</sup> Key Laboratory of Smart Drug Delivery, Ministry of Education, School of Pharmacy, Fudan University, NO. 826 Zhangheng Road, Shanghai 201203, P. R. China

E-mail: shenteng@fudan.edu.cn

<sup>b</sup> State Key Laboratory of High-performance Ceramics and Superfine Microstructures, Shanghai Institute of Ceramics, Chinese Academy of Sciences, Shanghai 200050, P. R. China

E-mail: hrchen@mail.sic.ac.cn

<sup>c</sup> Frontier Institute of Medical & Pharmaceutical Science and Technology, College of Chemistry and Chemical Engineering, Shanghai University of Engineering Science, NO. 333 Longteng Road, Shanghai 201620, P. R. China

E-mail: yuluo@sues.edu.cn

<sup>d</sup> Institute of Translational Medicine, Shanghai University, Shanghai 200444 P. R. China

<sup>e</sup> Institute for Frontier Materials, Deakin University, Geelong, Victoria 3216, Australia

### **Fabrication of NPs.**

PCPDTBT (0.25 mg) and F127 (50.0 mg) or F127-NH<sub>2</sub> (50.0 mg) were dissolved in 0.5 mL of THF respectively, then the fully mixed solution was dropped into a 10.0 mL 10% THF solution (water and THF, v/v = 9:1) under ultrasonic for 2 min. Then the THF was removed by a nitrogen flow and filtered products through a 0.22 µm PVDF filter. Concentrated the SPN or SPN-NH<sub>2</sub> through ultrafiltration (50 KD, 3500 rpm, 25 min) and the concentration was determined by a UV-vis spectrophotometer. For the preparation of HSPN, 0.1 mg hyaluronidase was stirred with EDC (1.8 µmol, 0.35 mg) and NHS (1.8 µmol, 0.21 mg) in 10 mL DI water for 2 h, then above obtained SPN-NH<sub>2</sub> was added to the solution and stir for another 8 h. Then ultrafiltration (50 KD, 3500 rpm, 25 min) was carried out to concentrate the obtained HSPN. For Fluorescent labeling, 5 mg FITC was dissolved in 0.5 mL DMSO, then 20 µL solution was added into obtained SPN-NH<sub>2</sub> and HSPN and stir for 1 h. Add 10% FITC (W/W) in the PCPDTBT during the process of SPN synthesis is another alternative labeling way.

### **Characterization of NPs.**

Morphology of SPN and HSPN were observed by transmission electron microscopy (TEM). ζ-Potential and size distribution of SPN and HSPN were measured with dynamic laser scattering (DLS). UV-vis absorption measurement and fluorescence absorption were performed on a UV-vis spectrophotometer and a fluorescence spectrophotometer. After that, 1mL hyaluronidase, SPN, and HSPN were mixed with 1 mL BCA reagent respectively, incubated at 37 °C in an oven for 2 h, and then tested by a UV-vis spectrophotometer. The ER (encapsulated ratio) % and DL (drug loading) % were calculated as follows:

$$ER \% = \frac{\text{Weight of encapsulated PCPDTBT}}{\text{Weight of the feeding PCPDTBT}} \times 100\%;$$

$$DL\% = \frac{\text{Weight of encapsulated PCPDTBT}}{\text{Weight of the feeding polymer and PCPDTBT}} \times 100\%.$$

200 µL SPN solutions were put into a 96-well plate and irradiated using an 808 nm laser for 6 min (1.0 W/cm<sup>2</sup>). Then the laser was turned off, and samples were naturally

cooled. An IR (infrared ray) thermal camera was used to monitor the temperature change. Five cycles of laser on/off were carried out to study the photothermal stability of SPN.

#### **Penetration Assay in Multicellular Tumor Spheroid (MCTS).**

50  $\mu\text{L}$  of hot 1.5% agarose solution (w/v) was quickly placed into a 96-well plate and then naturally cooled. Then the plate was irradiated under UV light for 2 h for sterilization and then washed three times by 10% penicillin/streptomycin with PBS buffer. 4-T1 cells were seeded into the agarose coated plate at a density of  $6 \times 10^3$  cells per well in 100  $\mu\text{L}$  of RPMI 1640 and cultured for 2 weeks with the medium changed every two days. Then the formed MCTS were co-incubated with FITC labeled SPN and HSPN for 4 h. After the incubation, MCTS was transferred to a confocal dish. fluorescence images were captured using Z-stack imaging from the top of the MCTS at 20  $\mu\text{m}$  intervals using CLSM.

#### **Preparation of MN model.**

PDMS was used to fabricate MN mold as illustrated in Figure S20. PDMS and its curing agent were mixed at a mass ratio of 10:1 and then stirred well. To remove bubbles in the mixture solution, a vacuum was performed at -0.08 MPa for 2 h. the PDMS solution was cast on a steel MN master model and then dried at 70  $^{\circ}\text{C}$  for 1 h to form PDMS flexible female mold. The PDMS mold was then separated from the steel master mold and was applied as a mold to prepare MN.

**Table S1.** Diameter and PDI of SPN and HSPN.

| Sample | Diameter (nm)     | PDI             |
|--------|-------------------|-----------------|
| SPN    | 94.66 $\pm$ 1.21  | 0.40 $\pm$ 0.02 |
| HSPN   | 102.13 $\pm$ 0.60 | 0.34 $\pm$ 0.08 |

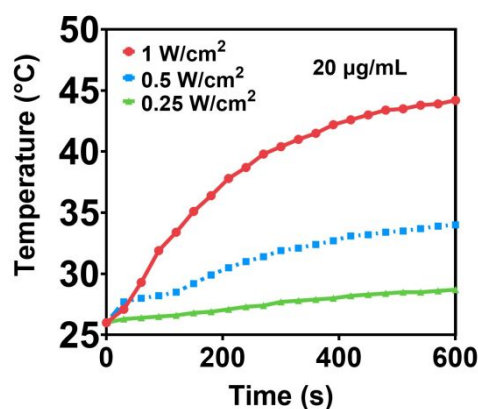

**Figure S1.** Photothermal curves of SPN (20 µg/mL) at different power.

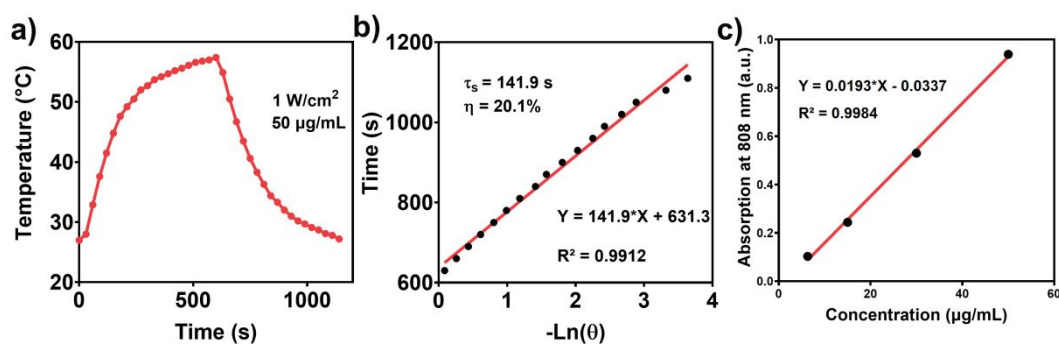

**Figure S2.** The photothermal effect of the SPN aqueous suspensions under irradiation and then the laser was shut off and calculation of the photothermal-conversion efficiency according to the (a) Photothermal curve, (b) Calculation of the time constant ( $\tau_s$ ), (c) Absorption of SPN at 808 nm at different concentration.

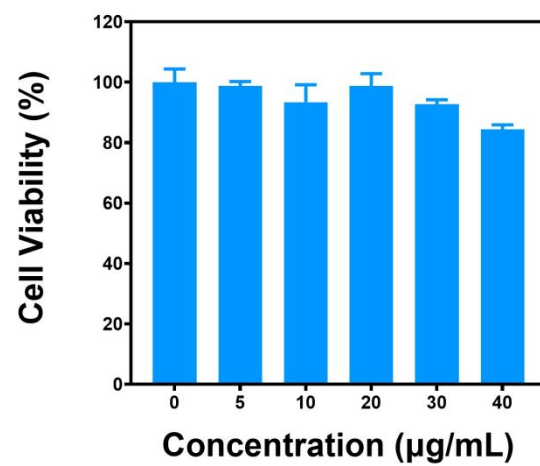

**Figure S3.** The cell viability of SPN to NIH3T3 cells after 24 h incubation.

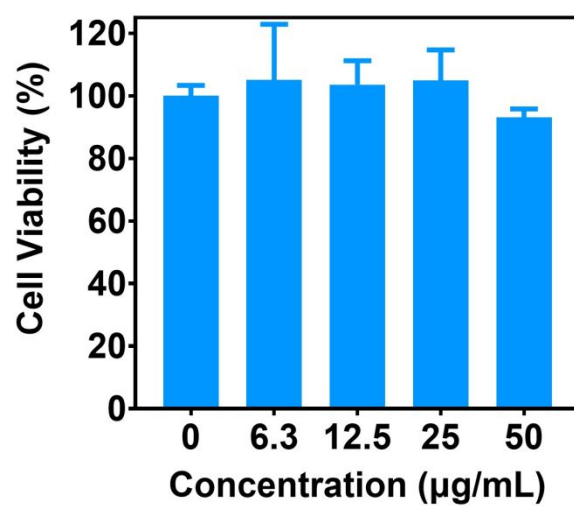

**Figure S4.** Cell viability of Melanoma cells after incubation with PIC at different concentrations after 24 h.

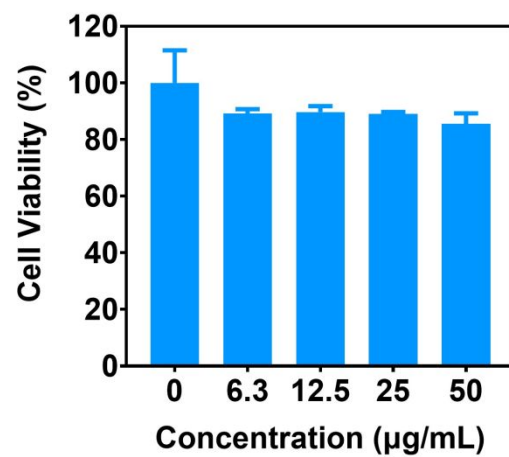

**Figure S5.** Cell viability of macrophages after incubation with PIC at different concentrations after 24 h.

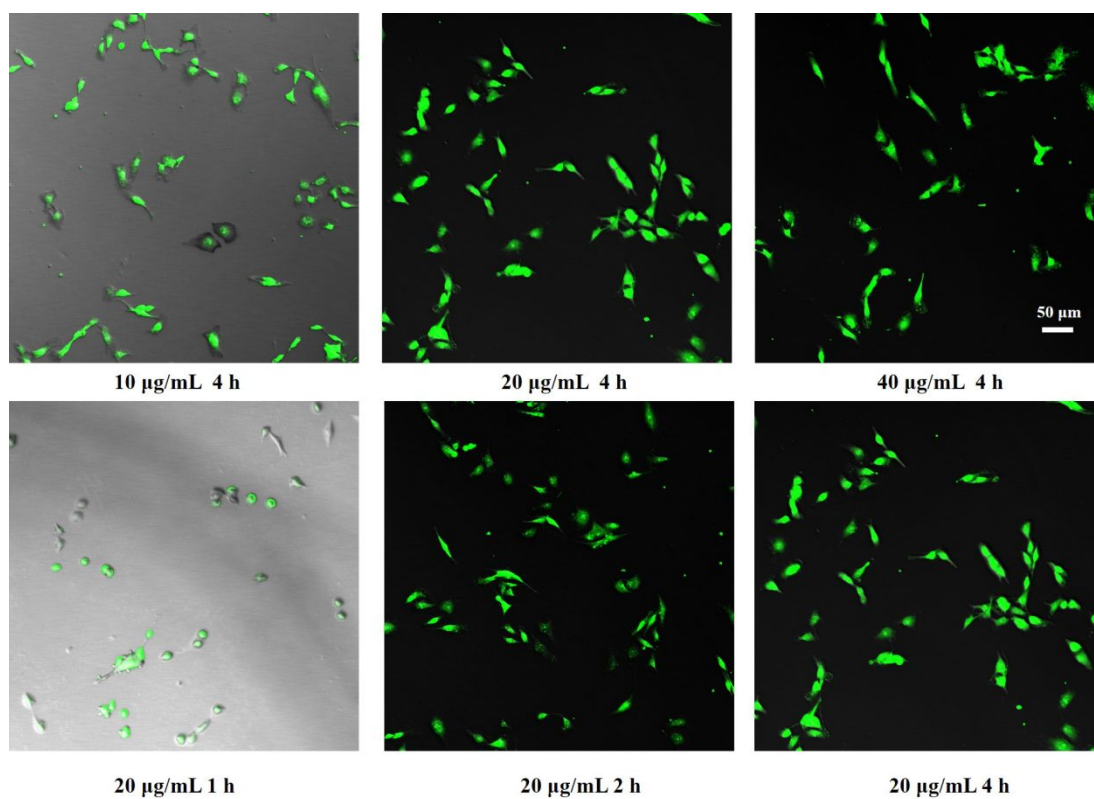

**Figure S6.** Fluorescence microscopy merged images of FITC labeled SPN uptake by B16-F10 melanoma cells in vitro, scale bar is 50 µm.

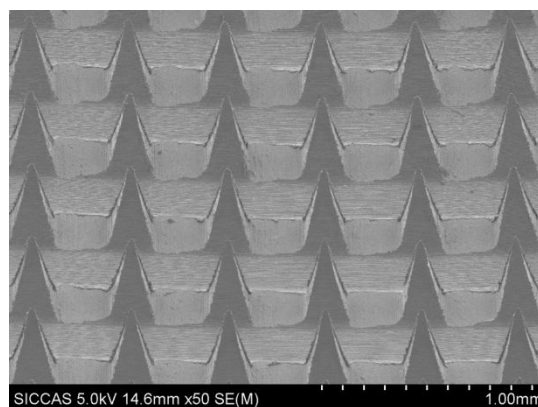

**Figure S7.** SEM images of MN in drying state (100 $\times$ ).

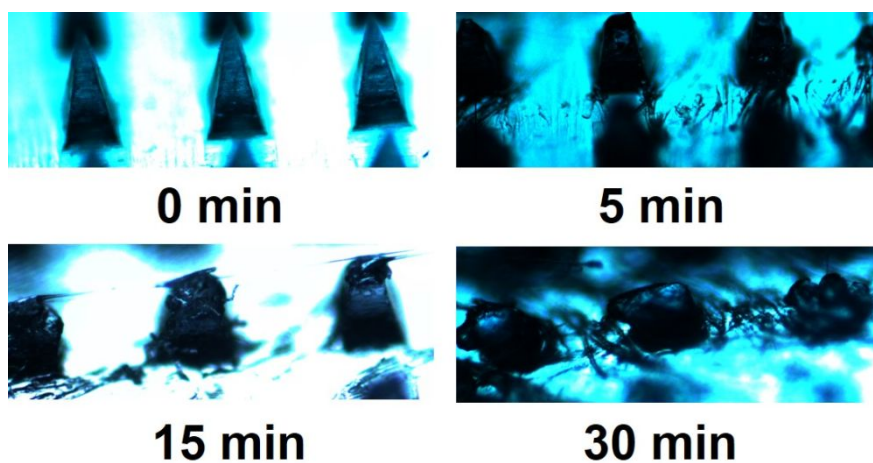

**Figure S8.** The time-dependent dissolving of MN.

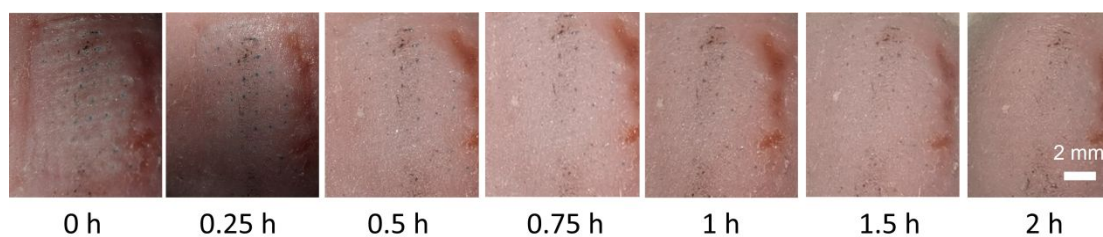

**Figure S9.** Optical images of skin recovery after penetration at 0.25 h, 0.5 h, 0.75 h, 1 h, 1.5 h, 2 h.

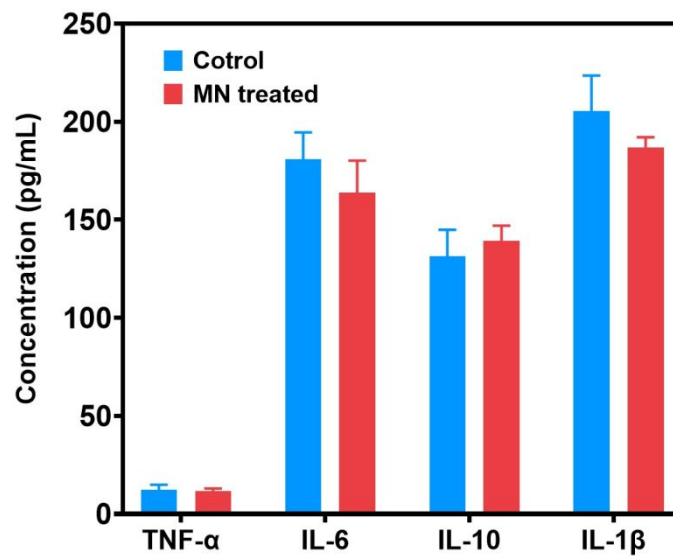

**Figure S10.** The changes of inflammatory cytokines of skin tissue after the insertion of MN for 2 h.

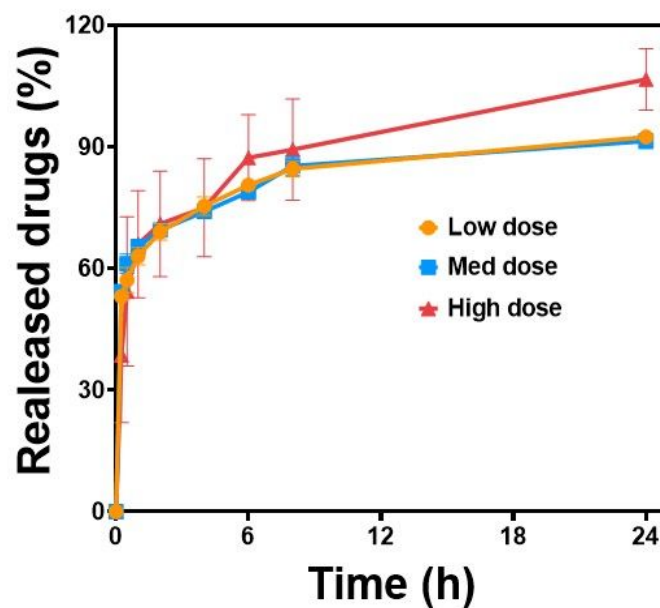

**Figure S11.** Accumulated percentage of PCPDTBT released from low dose, med dose and high dose (3  $\mu$ g, 6  $\mu$ g, 12  $\mu$ g) MN incubated in PBS (n = 3).



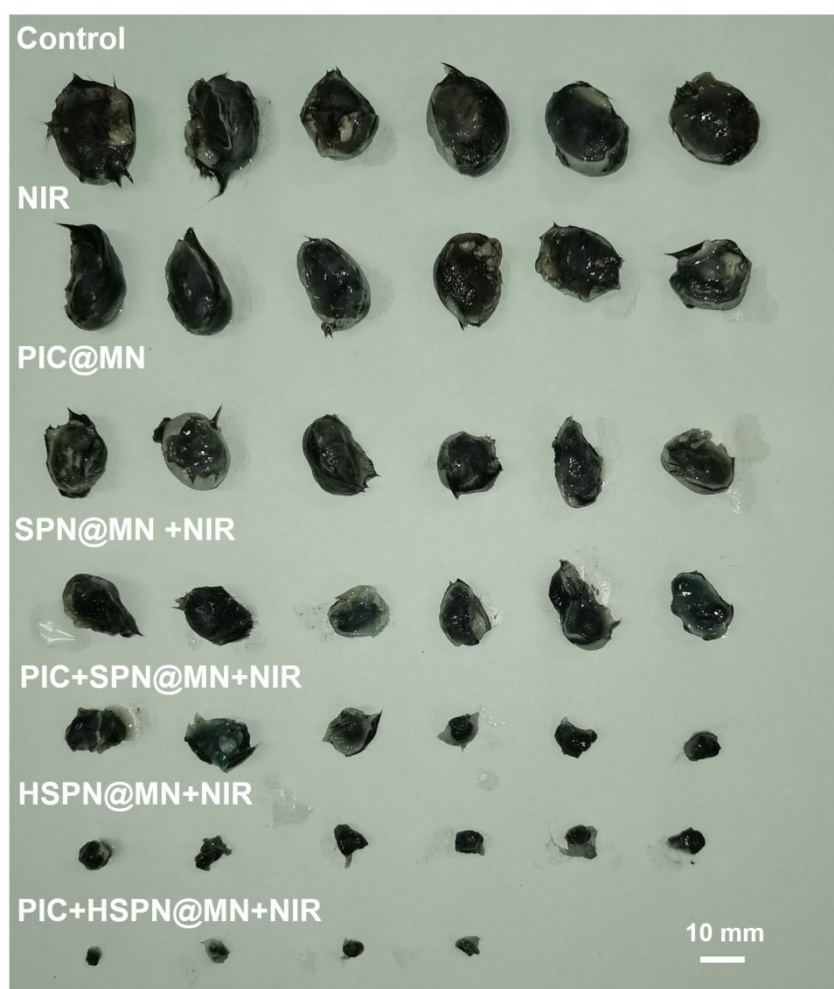

**Figure S12.** Photographs of C57B16 mice bearing transplanted B16-F10 tumors on the 12th day.

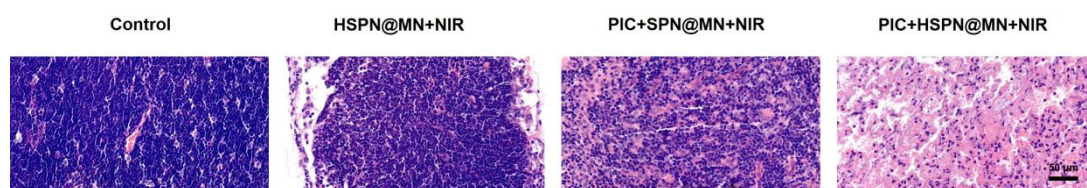

**Figure S13.** Histopathologic analysis of H&E-stained tissue sections of the lung in tumor-bearing mice after treatment for natural metastatic, scale bar is 50  $\mu\text{m}$ .

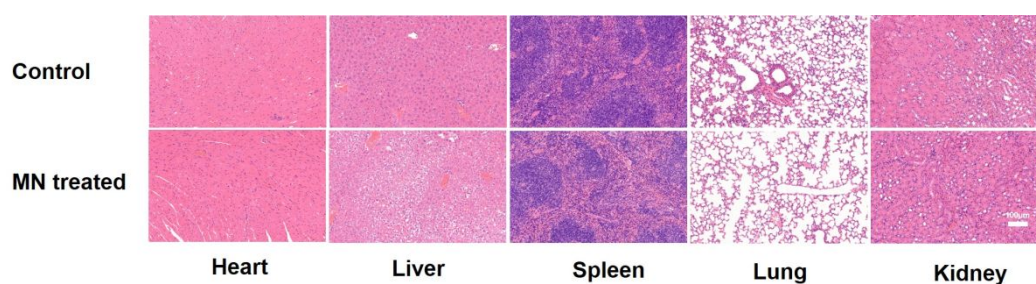

**Figure S14.** Pathological H&E stained images of the major organs sections of mice treated with PIC+HSPN@MN after 21 days, scale bar is 200  $\mu$ m.

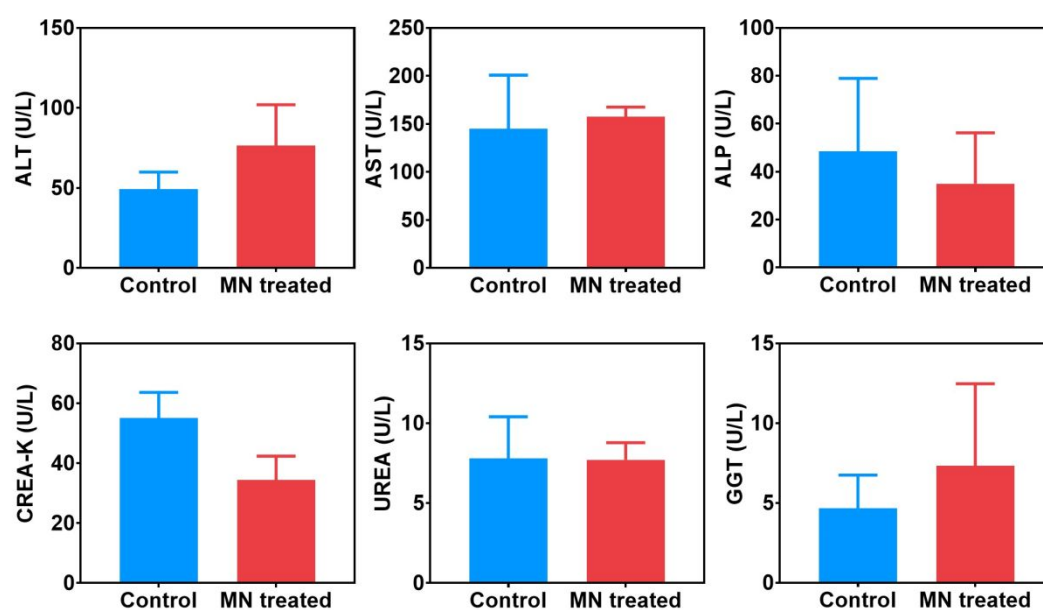

**Figure S15.** Routine blood test was analyzed in mice treated with PIC+HSPN@MN after 21 days. Data are expressed as SD  $\pm$  SEM (n=3).

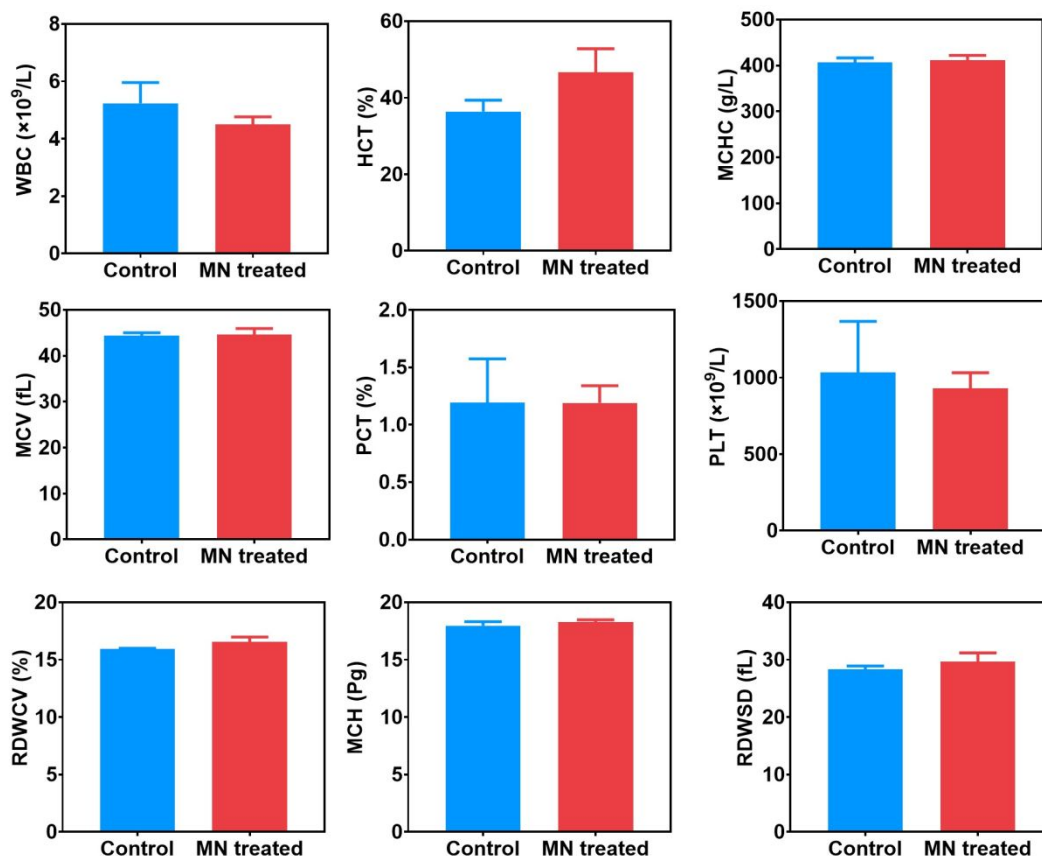

**Figure S16.** Comprehensive serum chemistry profiles were analyzed in mice treated with PIC+HSPN@MN after 21 days. Data are expressed as SD  $\pm$  SEM (n=3).

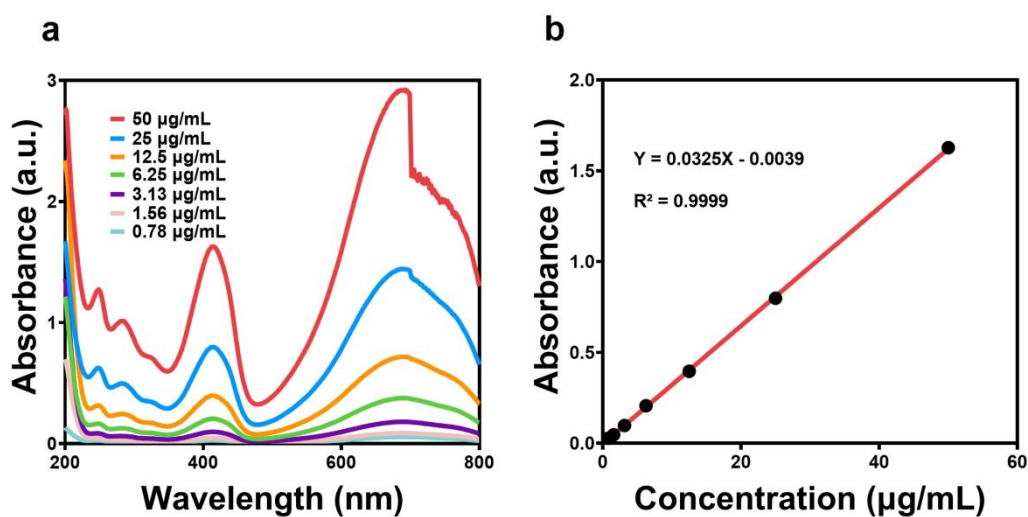

**Figure S17.** (a) UV-vis spectra of PCPDTBT and (b) Standard curve of PCPDTBT at 414 nm.

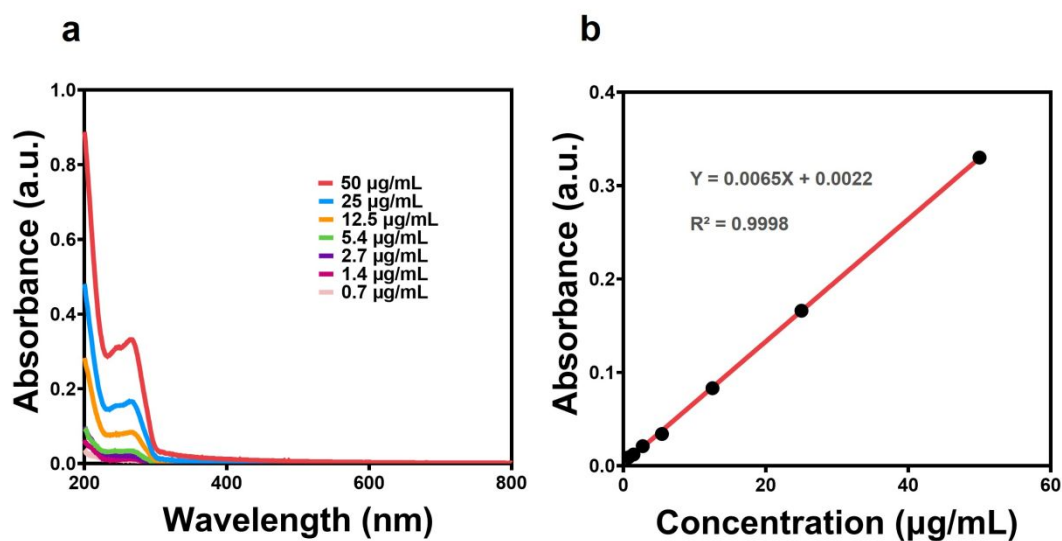

**Figure S18.** (a) UV-vis spectra of PIC and (b) Standard curve of PIC at 263 nm.

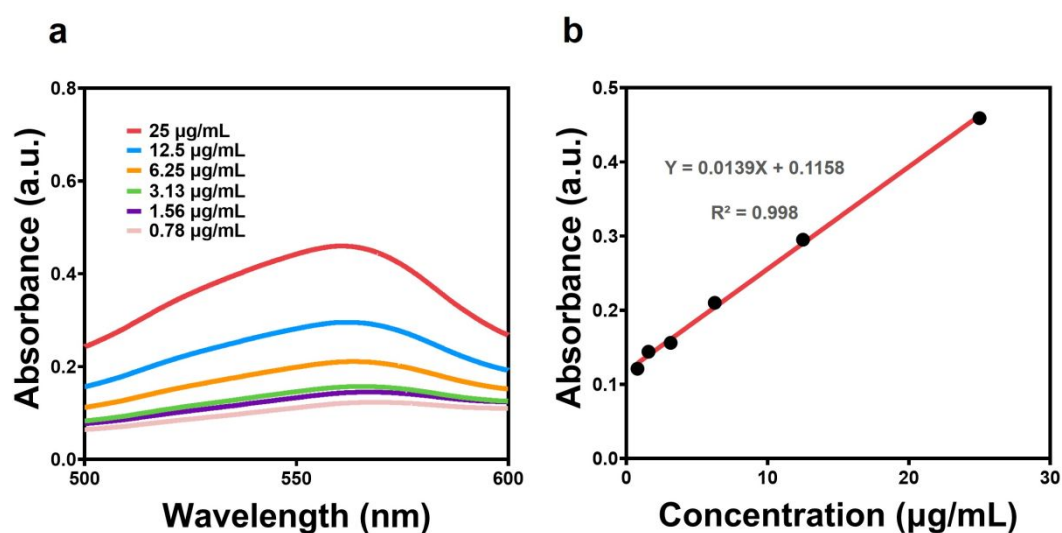

**Figure S19.** (a) UV-vis spectra of hyaluronidase after reacting with BCA assay and (b) Standard curve of hyaluronidase at 562 nm.

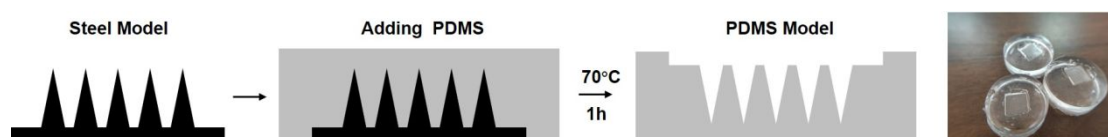

**Figure S20.** Schematic illustration showing the preparation of MN mold.
